1  
2  
3  
4  
5  
6  
7  
8  
9  
10  
11  
12  
13  
14  
15  
16  
17  
18  
19  
20  
21  
22

**Coherent natural scene structure facilitates the extraction of task-relevant object information in visual cortex**

Daniel Kaiser<sup>1</sup>, Greta Häberle<sup>2,3,4</sup>, Radoslaw M. Cichy<sup>2,3,4,5</sup>

<sup>1</sup>*Department of Psychology, University of York, York, UK*

<sup>2</sup>*Department of Education and Psychology, Freie Universität Berlin, Berlin, Germany*

<sup>3</sup>*Charité – Universitätsmedizin Berlin, Einstein Center for Neurosciences Berlin, Berlin, Germany*

<sup>4</sup>*Humboldt-Universität zu Berlin, Faculty of Philosophy, Berlin School of Mind and Brain, Berlin, Germany*

<sup>5</sup>*Bernstein Center for Computational Neuroscience Berlin, Berlin, Germany*

Correspondence:

Dr. Daniel Kaiser

Department of Psychology

University of York

Heslington, York

YO10 5DD, UK

danielkaiser.net@gmail.com

23

24 **Abstract**

25

26 Looking for objects within complex natural environments is a task everybody  
27 performs multiple times each day. In this study, we explore how the brain uses the  
28 typical composition of real-world environments to efficiently solve this task. We  
29 recorded fMRI activity while participants performed two different categorization tasks  
30 on natural scenes. In the object task, they indicated whether the scene contained a  
31 person or a car, while in the scene task, they indicated whether the scene depicted  
32 an urban or a rural environment. Critically, each scene was presented in an “intact”  
33 way, preserving its coherent structure, or in a “jumbled” way, with information  
34 swapped across quadrants. In both tasks, participants’ categorization was more  
35 accurate and faster for intact scenes. These behavioral benefits were accompanied  
36 by stronger responses to intact than to jumbled scenes across high-level visual  
37 cortex. To track the amount of object information in visual cortex, we correlated multi-  
38 voxel response patterns during the two categorization tasks with response patterns  
39 evoked by people and cars in isolation. We found that object information in object-  
40 and body-selective cortex was enhanced when the object was embedded in an intact,  
41 rather than a jumbled scene. However, this enhancement was only found in the object  
42 task: When participants instead categorized the scenes, object information did not  
43 differ between intact and jumbled scenes. Together, these results indicate that  
44 coherent scene structure facilitates the extraction of object information in a task-  
45 dependent way, suggesting that interactions between the object and scene  
46 processing pathways adaptively support behavioral goals.

47

48 **Keywords**

49

50 object perception, natural scene categorization, real-world structure, functional  
51 magnetic resonance imaging, multivariate pattern analysis

52

## 53 **1 Introduction**

54

55 Despite the complexity of our everyday environments, perceiving objects embedded  
56 in natural scenes is remarkably efficient. This efficiency is illustrated by studies that  
57 require participants to categorize objects under conditions of limited visual exposure:  
58 For instance, participants can tell whether a scene contains an animal or not from just  
59 a single glance (Thorpe et al., 1996; Potter, 1975, 2012), and even when only limited  
60 attentional resources are available (Li et al., 2002).

61 The ability to effortlessly make such categorization responses is underpinned  
62 by the efficient extraction of object information in visual cortex. Neuroimaging  
63 research has shown that the category of task-relevant objects can be reliably  
64 decoded from fMRI activity patterns in visual cortex, even when the objects are  
65 embedded in complex natural scenes (Peelen et al., 2009; Peelen & Kastner, 2011;  
66 Seidl et al., 2012) or movies (Cukur et al., 2013; Nastase et al., 2017; Shahdloo et al.,  
67 2020). M/EEG studies demonstrate that object category is represented well within the  
68 first 200ms of vision, even when the object is shown under such naturalistic  
69 conditions (Cauchoix et al., 2014; Kaiser et al., 2016; VanRullen & Thorpe, 2001;  
70 Thorpe et al., 1996). Together, these results highlight that the cortical processing of  
71 objects appearing within rich real-world environments is surprisingly efficient.

72 This processing efficiency becomes less surprising if scene context is not just  
73 considered as a nuisance that puts additional strain on our visual resources. Indeed,  
74 contextual information can facilitate object processing (Bar, 2004): For instance,  
75 scene context allows for efficient allocation of attention (Torralba et al., 2006; Wolfe  
76 et al., 2011; Vö et al., 2019), or for disambiguating object information under  
77 uncertainty (Brandmann & Peelen, 2017; Oliva & Torralba, 2007). Such findings  
78 demonstrate that object and scene processing mechanisms interact with each other  
79 to enable the efficient processing of object information.

80 Here, we investigated how the coherent spatial structure of the scene context  
81 aids the extraction of object information from the scene. To this end, we used a  
82 jumbling paradigm, in which we disrupted the scenes' coherent structure by dividing  
83 them into multiple rectangular pieces and shuffling those pieces. Classical studies

84 suggest that jumbling drastically impairs participants' ability to categorize both the  
85 scene itself (Biederman et al., 1974), and the object embedded within the scene  
86 (Biederman et al., 1972, 1973). Such impairments can be linked to changes in cortical  
87 scene processing: We have recently shown that scene-selective brain responses are  
88 less pronounced and contain less scene category information when the scene is  
89 jumbled (Kaiser et al., 2020a, 2020b). However, it is unclear how these changes in  
90 scene-selective activations modulate the representation of objects within the scene.

91 In the current study, we thus set out to characterize how the presence of an  
92 intact – versus a jumbled – scene context modulates object representations in visual  
93 cortex. First, we asked whether cortical object processing is indeed facilitated by the  
94 presence of a coherent scene context. Second, we asked whether such facilitation  
95 effects depend on the objects being relevant or irrelevant for current behavioral goals.

96 To answer these questions, we recorded fMRI activity while participants  
97 categorized objects contained in intact or jumbled scenes. We found that fMRI  
98 responses across high-level visual cortex were generally higher for intact scenes than  
99 for jumbled scenes, revealing widespread sensitivity to scene structure. When  
100 analyzing object category information in multi-voxel response patterns, we found that  
101 coherent scene structure enhanced object information in object-selective visual  
102 cortex. However, this enhancement was task-specific: When participants categorized  
103 the scenes instead of the objects, we found no such enhancement of object  
104 information. These results suggest that the visual brain uses coherent real-world  
105 structure to more efficiently extract task-relevant object information from complex  
106 scenes.

## 107 **2 Materials and Methods**

108

### 109 **2.1 Participants**

110 Twenty-five healthy adults (mean age 26.4 years, SD=5.3; 15 female, 10 male)  
111 participated. All participants had normal or corrected-to-normal vision. They all  
112 provided informed written consent and received either monetary reimbursement or  
113 course credits. Procedures were approved by the ethical committee of the  
114 Department of Psychology at Freie Universität Berlin and were in accordance with the  
115 Declaration of Helsinki.

116

### 117 **2.2 Stimuli**

118 The stimulus set consisted of colored natural scene photographs (640×480 pixels  
119 resolution). Scenes were selected to cover three independent manipulations. First,  
120 each scene contained one of two object categories: half of the scenes contained a  
121 person (or multiple people), whereas the other half contained a car (or multiple cars).  
122 Second, the person or car appeared equally often in each of the quadrants of the  
123 scene. Third, each scene belonged to one of two scene categories: half of the scenes  
124 depicted urban environments, the other half depicted rural environments. For each  
125 possible combination of these factors (e.g., a person appearing in the bottom left  
126 quadrant of a rural scene), 10 unique scene exemplars were available, yielding 160  
127 scenes in total (2 object categories × 4 object locations × 2 scene categories × 10  
128 exemplars). During the experiment, the scenes could be presented in their original  
129 orientation or mirrored along their vertical axis (as in Kaiser et al., 2016), yielding a  
130 total of 320 different scene stimuli. Example scenes are shown in Figure 1a.

131 To manipulate scene structure, we either presented the scenes in a coherent,  
132 “intact” condition or in an incoherent, “jumbled” condition. Jumbled scenes were  
133 generated by shuffling the four quadrants of the image in a crisscrossed way (Figure  
134 1b). This manipulation solely affected the scene’s structure, but not the people or  
135 cars contained in the scene: First, as the objects never straddled the boundary  
136 between quadrants, the objects themselves always remained unaltered. Second, as  
137 the objects appeared equally often in each quadrant before jumbling the scenes, they  
138 also appeared equally often in each quadrant after jumbling them.

139 In total, 640 scene images were used, which covered 320 intact scenes and  
140 320 jumbled scenes. Additionally, 200 colored texture masks (Kaiser et al., 2016) were  
141 used to visually mask the scenes during the experiment (see below).

142

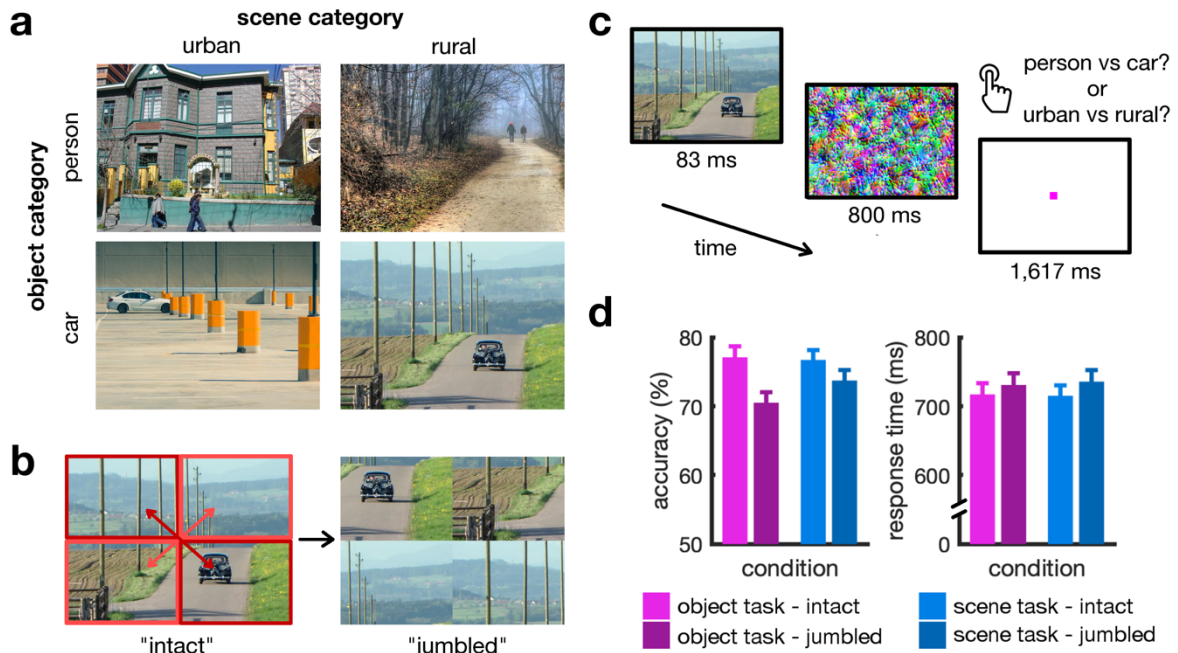

143

144 **Figure 1. Stimuli, paradigm, and behavioral results.** **a)** Stimuli consisted of natural  
145 scene images from two categories: urban or rural environments. Each of the scenes  
146 contained one of two object categories: people or cars. **b)** During the experiment,  
147 these scenes were shown in an unaltered way ("intact" condition) or with their  
148 quadrants intermixed ("jumbled" condition). The jumbled scenes were created by  
149 shuffling the quadrants in a crisscrossed way, as illustrated. **c)** Participants viewed  
150 each scene briefly, followed by a visual mask. In separate runs, they performed two  
151 different tasks: They were either asked to indicate whether the scene contained a  
152 person or a car ("object task") or whether the scene depicted an urban or a rural  
153 environment ("scene task"). **d)** In both tasks, scene structure impacted behavioral  
154 performance: Participants were significantly more accurate and faster for the intact  
155 scenes than for the jumbled scenes. Error bars represent standard errors of the mean.

156

### 157 **2.3 Experimental Paradigm**

158 Each participant completed four experimental runs of 17 minutes each. Each run  
159 contained 320 experimental trials, corresponding to 320 unique scene stimuli. For

160 half of the participants, the even runs only contained the original scenes, while the  
161 odd runs only contained the horizontally mirrored scenes; for the other half of the  
162 participants, the odd runs only contained the original scenes, while the even runs only  
163 contained the horizontally mirrored scenes. Each of the scenes was presented once  
164 during the run, with order fully randomized.

165 On each trial, the scene was presented for 83ms, immediately followed by a  
166 visual mask (chosen randomly from the 200 available masks) for 800ms. Images were  
167 shown within a black rectangle (10deg X 7.5deg visual angle). After an inter-trial  
168 interval of 1,617ms, during which a pink fixation dot was shown, the next trial started.  
169 An example trial is illustrated in Figure 1c. In addition to the experimental trials, each  
170 run contained 80 fixation-only trials, during which only the fixation dot was displayed.  
171 Runs started and ended with a brief fixation period.

172 In two of the four runs, participants were asked to categorize the object  
173 contained in each scene as either a person or a car (“object task”). In the other two  
174 runs, participants were asked to categorize the scene as either a rural or an urban  
175 environment (“scene task”). Participants were instructed to respond as accurately  
176 and quickly as possible, with an emphasis on accuracy. Button-press responses were  
177 recorded during the whole inter-trial interval (i.e., until 2,500s after stimulus onset).  
178 The four runs were alternating between the object and scene tasks. The task in the  
179 first run was counter-balanced between participants. Notably, physical stimulation  
180 was completely identical across the object and scene tasks.

181 All stimuli were back-projected onto a translucent screen mounted to the head  
182 end of the scanner bore. Participants viewed the stimulation through a mirror  
183 attached to the head coil. Stimulus presentation was controlled using the  
184 Psychtoolbox (Brainard, 1997).

185

#### 186 **2.4 Benchmark Localizer Paradigm**

187 In addition to the experimental runs, each participant completed a benchmark  
188 localizer run, which was designed to obtain “benchmark” patterns in response to  
189 people and cars in isolation (Peelen et al., 2009; Peelen & Kastner, 2011). During this  
190 run, participants viewed images of bodies, cars, and scrambled images of bodies and  
191 cars. For each of the three categories, 40 images were used. All images were different

192 than the ones used in the main experiment. These images were presented in a block  
193 design. Each block lasted 20 seconds and contained 20 images of one of the three  
194 categories, or only a fixation cross. Images were presented for 500ms (5deg × 5deg  
195 visual angle), separated by a 500ms inter-stimulus interval. The benchmark localizer  
196 run consisted of a total of 24 blocks (6 blocks for each of the three stimulus  
197 categories, and 6 fixation-only blocks). Four consecutive blocks always contained the  
198 four different conditions in random order. Participants were instructed to respond to  
199 one-back image repetitions (i.e., two identical images back-to-back), which  
200 happened once during each non-fixation block. The benchmark localizer run lasted  
201 8:30 minutes and was completed halfway through the experiment, after two of the  
202 four experimental runs.

203

## 204 **2.5 fMRI recording and preprocessing**

205 MRI data was acquired using a 3T Siemens Tim Trio Scanner equipped with a 12-  
206 channel head coil. T2\*-weighted gradient-echo echo-planar images were collected  
207 as functional volumes (TR=2s, TE=30ms, 70° flip angle, 3mm<sup>3</sup> voxel size, 37 slices,  
208 20% gap, 192mm FOV, 64×64 matrix size, interleaved acquisition). Additionally, a T1-  
209 weighted anatomical image (MPRAGE; 1mm<sup>3</sup> voxel size) was obtained.

210 Preprocessing and hemodynamic response modelling was performed using  
211 SPM12 ([www.fil.ion.ucl.ac.uk/spm/](http://www.fil.ion.ucl.ac.uk/spm/)). Functional volumes were realigned and  
212 coregistered to the anatomical image. Further, the T1 image was segmented to obtain  
213 transformation parameters to standard MNI-305 space.

214 Functional data from each experimental run were modelled in a general linear  
215 model (GLM) with 16 experimental predictors (2 object categories × 4 object locations  
216 × 2 scene categories). Additionally, we included the six movement regressors  
217 obtained during realignment. Data from the benchmark localizer run were modelled  
218 in a GLM with three experimental predictors (person, car, scrambled) and six  
219 movement regressors.

220

## 221 **2.6 Region of interest definition**

222 We restricted fMRI analyses to five regions of interest (ROIs): early visual cortex (V1),  
223 object-selective lateral occipital cortex (LO), body-selective extrastriate body area



224 (EBA), scene-selective occipital place area (OPA), and scene-selective  
225 parahippocampal place area (PPA). ROIs masks were defined using group-level  
226 activation masks from functional brain atlases (for V1: Wang et al., 2015; for LO, EBA,  
227 OPA, and PPA: Julian et al., 2012). ROIs were defined separately for each  
228 hemisphere. All ROI masks were inverse-normalized into individual-participant space  
229 using the parameters obtained during T1 segmentation. Voxel counts in individual-  
230 participant space amounted to 248/271 (V1; left/right), 929/947 (LO), 402/443 (EBA),  
231 26/47 (OPA), and 140/105 (PPA). Notably, the LO and EBA ROIs overlapped to some  
232 extent (300/406 voxels overlap, left/right); the inclusion of the EBA allowed us to see  
233 whether the results hold in a smaller cortical region with a narrower category  
234 preference for bodies. As we did not have any hypothesis related to hemispheric  
235 differences, all results for the left- and right-hemispheric ROIs were averaged before  
236 statistical analysis.

237

## 238 **2.7 Univariate analysis**

239 Response magnitudes during the experimental runs were analyzed separately for  
240 each ROI. We first averaged beta values across the two object-task and scene-task  
241 runs, respectively. We then averaged beta values across object categories, object  
242 locations, and scene categories. This way, we obtained response magnitudes for four  
243 conditions: (1) responses to intact scenes in the object task, (2) responses to jumbled  
244 scenes in the object task, (3) responses to intact scenes in the scene task, and (4)  
245 responses to jumbled scenes in the scene task. These four conditions allowed us to  
246 separately estimate the effects of task (object task versus scene task) and scene  
247 structure (intact versus jumbled) on neural responses across the five ROIs.

248

## 249 **2.8 Multivariate pattern analysis**

250 Multivariate pattern analysis (MVPA) was carried out in CoSMoMVPA (Oosterhof et  
251 al., 2016). Our MVPA approach closely followed similar fMRI studies that investigated  
252 the representation of objects in natural scenes (Peelen et al., 2009; Peelen & Kastner,  
253 2011). We first computed a one-sample t-contrasts for every condition against  
254 baseline. In the benchmark localizer run, there were 2 such t-contrasts (one for people  
255 versus baseline, and one for cars versus baseline). In the object task and scene task

256 runs, there were 16 t-contrasts each (one contrast for each experimental condition  
257 against baseline, reflecting 2 object categories  $\times$  4 object locations  $\times$  2 scene  
258 categories). For each of the three tasks (benchmark localizer, object task, and scene  
259 task), the resulting t-values were normalized for each voxel by subtracting the average  
260 t-value across conditions. For each ROI, multi-voxel response patterns were  
261 constructed by concatenating the t-values across all voxels belonging to the ROI.

262 To obtain an index of object discriminability (i.e., how discriminable people and  
263 cars in scenes are based on multi-voxel response patterns), we performed a cross-  
264 correlation MVPA. The goal of this analysis was to quantify how “person-like” or “car-  
265 like” the cortical representation of each of the scenes was, thereby isolating the  
266 amount of object category information in visual cortex. To this end, we correlated  
267 multi-voxel response patterns evoked by people and cars in isolation (from the  
268 benchmark localizer) with response patterns evoked by people and cars contained in  
269 a scene (from one of the experimental tasks). These correlations were Fisher-  
270 transformed. To quantify object discriminability, we then subtracted the correlations  
271 between different categories (e.g., person in isolation and car within a scene) from  
272 correlations between the same categories (e.g., person in isolation and person within  
273 a scene). This yielded an index of category-discriminability, with values greater than  
274 zero indicating that the two categories are represented differently (Haxby et al., 2001).

275 Before performing this analysis, response patterns in the main experiment  
276 were averaged across object locations and scene categories. This way, we obtained  
277 an index of object category-discriminability for four separate conditions: (1) category-  
278 discriminability for intact scenes in the object task, (2) category-discriminability for  
279 jumbled scenes in the object task, (3) category-discriminability for intact scenes in  
280 the scene task, and (4) category-discriminability for jumbled scenes in the scene task.  
281 The resulting four conditions allowed us to estimate the effects of scene structure on  
282 the quality of object representations in visual cortex, both when the objects were  
283 task-relevant and task-irrelevant.

284

## 285 **2.9 Statistical testing**

286 To compare behavioral performance, univariate responses, and multi-voxel pattern  
287 information across conditions, we used repeated-measures ANOVAs and paired-  
288 sample t-tests.

289

### 290 ***2.10 Data availability***

291 Data are publicly available on OSF ([doi.org/10.17605/osf.io/gs2t5](https://doi.org/10.17605/osf.io/gs2t5)). Other materials  
292 are available from the corresponding author upon request.

293

294

## 295 **3 Results**

296

### 297 ***3.1 Coherent scene structure facilitates the perception of objects within scenes***

298 We first analyzed participants' behavioral performance in the object and scene tasks,  
299 separately for the intact and jumbled scenes (Figure 1d). In the object task,  
300 participants' categorization (person versus car) of objects within the intact scenes  
301 was more accurate,  $t(24)=8.28$ ,  $p<.001$ , and faster,  $t(24)=3.26$ ,  $p=.0033$ , compared to  
302 the jumbled scenes. In the scene task, participants' categorization (rural versus urban)  
303 of the intact scenes was more accurate,  $t(24)=4.77$ ,  $p<.001$ , and faster,  $t(24)=3.26$ ,  
304  $p=.0033$ , compared to the jumbled scenes. These results are in line with classical  
305 findings on object and scene categorization in jumbling paradigms (Biederman, 1972;  
306 Biederman et al., 1973, 1974), showcasing that scene jumbling has a profound impact  
307 on perception.

308 Further, when directly comparing the two tasks, we did not find differences in  
309 accuracy,  $F(1,24)=3.13$ ,  $p=.090$ , or response times,  $F(1,24)=0.04$ ,  $p=.84$ . Any  
310 differences in neural responses are therefore unlikely to reflect differences in task  
311 difficulty, and therefore attentional engagement, between the two tasks.

312 Together, these results demonstrate that jumbling similarly impairs the  
313 perception of the scene and the objects contained in it, demonstrating a cross-  
314 facilitation between scene and object vision that can be observed on the behavioral  
315 level.

316

### 317 ***3.2 Scene structure impacts univariate responses across object- and scene- 318 selective cortex***

319 To quantify the effects of scene jumbling on the neural level, we first ran univariate  
320 analyses. In these analyses, we compared fMRI response magnitudes across the  
321 intact and jumbled scenes and across the two tasks (Figure 2). To do so, we  
322 performed a  $2 \times 2$  repeated measures ANOVA with the factors scene structure (intact  
323 versus jumbled) and task (object task versus scene task). The analysis was performed  
324 separately and in turn for each of the five ROIs: V1, LO, EBA, OPA, and PPA. Detailed  
325 results for these analyses can be found in Table 1.

326 In V1, responses were comparable across all conditions, all  $F < 1.25$ ,  $p > .27$ ,  
 327 suggesting that V1 is not sensitive to typical scene composition.

328 In all extrastriate ROIs, we found a main effect of scene structure, which  
 329 indicated stronger responses to intact than to jumbled scenes, all  $F(1,24) > 7.95$ ,  
 330  $p < .010$ . Comparing this effect across regions, we found that it was more pronounced  
 331 in the scene-selective regions, OFA versus LO/EBA, both  $F(1,24) > 31.17$ ,  $p < .001$ , and  
 332 PPA versus LO/EBA, both  $F(1,24) > 35.55$ ,  $p < .001$ . This finding confirms our previous  
 333 fMRI results, which revealed particularly strong effects of scene jumbling in scene-  
 334 selective areas of visual cortex (Kaiser et al., 2020a).

335

336 **Table 1:** *Univariate responses, analyzed in a 2x2 repeated measures ANOVA with the*  
 337 *factors scene structure (intact versus jumbled) and task (object task versus scene*  
 338 *task). Significant effects are highlighted in bold.*

| <b>ROI</b> | <b>Main Effect<br/>Scene Structure</b>                    | <b>Main Effect<br/>Task</b>                           | <b>Interaction Effect<br/>Structure × Task</b> |
|------------|-----------------------------------------------------------|-------------------------------------------------------|------------------------------------------------|
| V1         | $F(1,24)=1.25$ , $p=.28$                                  | $F(1,24)<0.01$ , $p=.98$                              | $F(1,24)=0.09$ , $p=.76$                       |
| LO         | <b><math>F(1,24)=9.74</math>, <math>p=.005</math></b>     | $F(1,24)=0.04$ , $p=.85$                              | $F(1,24)=0.97$ , $p=.33$                       |
| EBA        | <b><math>F(1,24)=7.95</math>, <math>p=.009</math></b>     | $F(1,24)=0.21$ , $p=.65$                              | $F(1,24)=2.46$ , $p=.13$                       |
| OPA        | <b><math>F(1,24)=27.18</math>, <math>p&lt;.001</math></b> | $F(1,24)=0.09$ , $p=.77$                              | $F(1,24)=0.97$ , $p=.34$                       |
| PPA        | <b><math>F(1,24)=48.02</math>, <math>p&lt;.001</math></b> | <b><math>F(1,24)=6.51</math>, <math>p=.017</math></b> | $F(1,24)=0.51$ , $p=.48$                       |

339

340 In all ROIs, scene structure affected univariate responses similarly across the  
 341 two tasks, as indexed by no significant interaction effects, all  $F < 2.46$ ,  $p > 0.12$ . This  
 342 pattern of results mirrors the pattern observed in behavior, where scene jumbling  
 343 produced comparable effects in the object and scene tasks.

344 PPA was the only region that additionally showed an effect of task,  
 345  $F(1,24)=6.51$ ,  $p=.017$ , with stronger responses in the scene task compared to the  
 346 object task. This suggests an increased importance of computations in higher-level  
 347 scene-selective cortex when scene attributes were behaviorally relevant.

348 Having established that scene structure enhanced cortical responses across  
 349 object- and scene-selective cortex, and similarly for both tasks, we next asked how  
 350 scene structure contributes to the extraction of object information – both when the  
 351 objects are behaviorally relevant and when they are not.

352

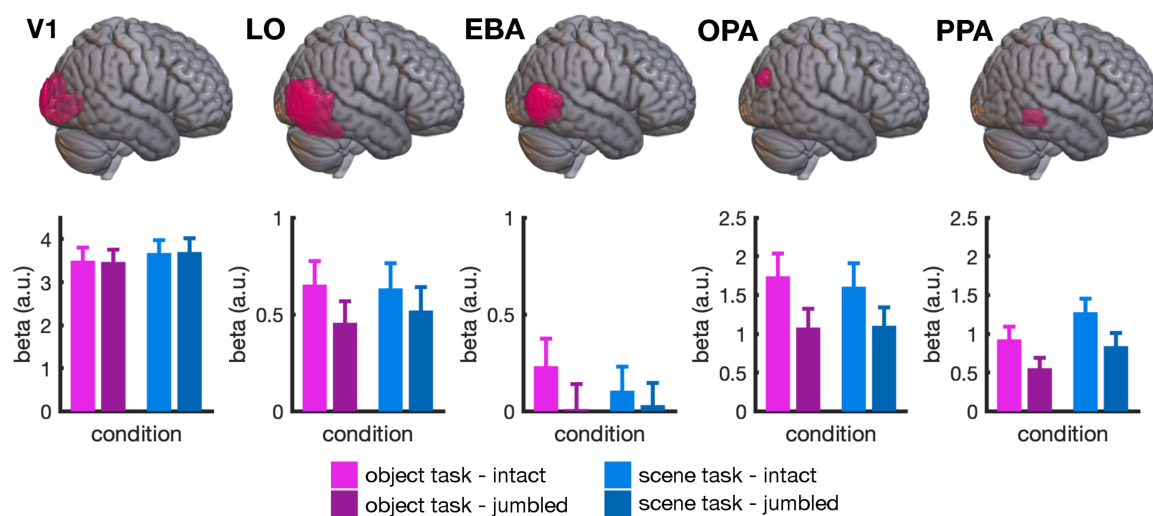

353

354 **Figure 2. Univariate results.** In all extrastriate regions, but not in V1, we found a  
355 significant main effect of scene structure: Intact scenes led to significantly stronger  
356 responses than jumbled scenes. This effect was comparable across the two tasks and  
357 most pronounced in scene-selective ROIs. PPA was the only region that additionally  
358 showed a modulation by task, with significantly stronger responses when participants  
359 were categorizing the scenes, compared to when they were categorizing the objects  
360 within them. For illustration purposes, ROI masks are shown on the right hemisphere  
361 of a standard-space template using MRICroGL (Li et al., 2016); the displayed results  
362 are averaged across ROIs in both hemispheres. Error bars represent standard errors  
363 of the mean.

364

### 365 **3.2 Coherent scene structure enhances task-relevant object information in** 366 **multi-voxel response patterns**

367 To understand how the coherent spatial structure of the scene impacts cortical object  
368 processing, we performed a cross-correlation multivariate pattern analysis (MVPA).  
369 In this analysis, we correlated the multi-voxel response patterns evoked by objects  
370 embedded in scenes (from the object and scene tasks) with the patterns evoked by  
371 the objects in isolation (from the benchmark localizer) (Figure 3a). This approach  
372 allowed us to quantify how “person-like” or “car-like” the cortical representation of  
373 each of the scenes was, thereby isolating the amount of object information present  
374 in visual cortex. When object information is operationalized in this way, it can be  
375 separated from differences in the scene context (as in the benchmark localizer no

376 scene context is presented) and task-related differences (as in the benchmark  
377 localizer participants perform a different task).

378 To quantify object information, we computed a cross-correlation measure by  
379 subtracting correlations between different categories (e.g., person in isolation and car  
380 within a scene) from correlations between the same categories (e.g., person in  
381 isolation and person within a scene) (Figure 3a). This measure was computed  
382 separately for each the object and scene tasks, the intact and jumbled scenes, and  
383 all ROIs.

384 To test whether multi-voxel response patterns contained any information at all  
385 about the object contained in the scenes, we first averaged the cross-correlation  
386 measure across all conditions. We then tested whether the average category  
387 information was significantly different from zero, separately for each ROI. As  
388 expected, people and cars could be reliably discriminated from response patterns in  
389 the object-selective LO,  $t(24)=7.56$ ,  $p<.001$ , and body-selective EBA,  $t(24)=8.00$ ,  
390  $p<.001$ , but not from response patterns in V1,  $t(24)=0.80$ ,  $p=.43$ , or scene-selective  
391 OPA,  $t(24)=0.49$ ,  $p=.63$ , and PPA,  $t(24)=0.70$ ,  $p=.49$ .

392 Given that we only found robust object information in LO and EBA, we only  
393 performed further analyses for these two regions (Figure 3b). Data were again  
394 analyzed in a 2x2 ANOVA with factors scene structure (intact vs jumbled) and task  
395 (object task vs scene task), separately for LO and EBA.

396 When analyzing the amount of object information contained in LO response  
397 patterns, we found a significant interaction between task and scene structure,  
398  $F(1,24)=5.63$ ,  $p=.026$ : When participants performed the object task, object  
399 information in LO was more pronounced for objects embedded in intact compared to  
400 jumbled scenes,  $t(24)=2.65$ ,  $p=.014$ . This effect was absent when participants  
401 performed the scene task,  $t(24)=1.22$ ,  $p=.24$ . A similar interaction effect was found in  
402 the EBA,  $F(1,24)=5.19$ ,  $p=.032$ : Object information was again enhanced for intact  
403 scenes during the object task,  $t(24)=2.30$ ,  $p=.030$ , but not during the scene task,  
404  $t(24)=0.92$ ,  $p=.37$ . These results demonstrate that coherent scene structure indeed  
405 enhances object representations in visual cortex. However, this enhancement  
406 depends on the behavioral relevance of the object: When scene category, rather than  
407 object category, was task-relevant, no such enhancement was observed.

408

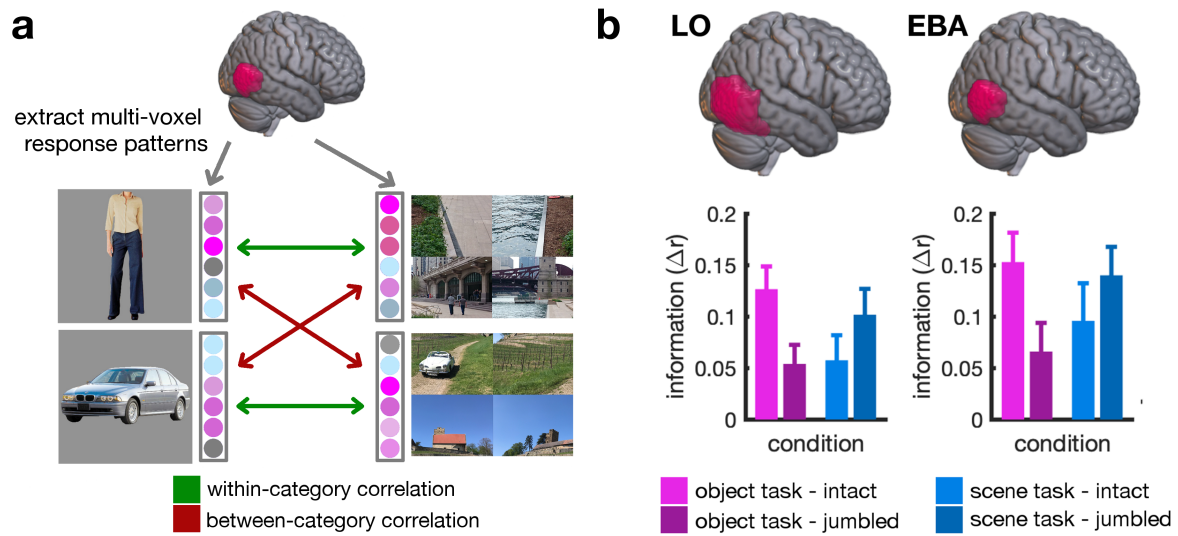

409

410 **Figure 3. Cross-correlation MVPA logic and results.** **a)** To measure object  
411 discriminability, we extracted multi-voxel response patterns for each ROI, separately  
412 for objects in isolation (from the benchmark localizer) and objects appearing within  
413 the scenes (from the main experiment). We then computed within- and between-  
414 category correlations. By subtracting the between-category from the within-category  
415 correlations, we obtained an index of category information ( $\Delta r$ ). **b)** In both LO and  
416 EBA, category information was significantly higher for objects that were embedded in  
417 intact scenes than for objects embedded in jumbled scenes. However, this was only  
418 true when participants performed the object task; when they performed the scene  
419 task, no significant difference in object category information was observed when  
420 comparing intact and jumbled scenes. For illustration purposes, ROI masks are shown  
421 on the right hemisphere of a standard-space template using MRIcroGL (Li et al., 2016);  
422 the displayed results are averaged across ROIs in both hemispheres. Error bars  
423 represent standard errors of the mean.

424



425

## 426 **4 Discussion**

427

### 428 ***4.1 Coherent scene structure facilitates task-relevant object processing***

429 In this study, we shed light on neural object processing in situations where the object  
430 is either embedded within a coherent, intact scene or an incoherent, jumbled scene.  
431 Consistent with classical studies (Biederman, 1972; Biederman et al., 1973, 1974),  
432 our participants were more accurate and faster in perceiving intact, compared to  
433 jumbled scenes, both when performing an object categorization task and a scene  
434 categorization task. Consistent with our own recent fMRI work (Kaiser et al., 2020a),  
435 intact scenes yielded stronger neural responses than jumbled scenes across high-  
436 level visual cortex. Importantly, our current results show that scene structure also  
437 matters when it comes to the neural representation of objects within the scene: When  
438 analyzing the amount of object information contained in multi-voxel response  
439 patterns in object and body-selective visual cortex, we found an enhancement of  
440 object information when the objects were embedded within intact scenes, compared  
441 to jumbled scenes. Critically, this enhancement only emerged in the object  
442 categorization task, suggesting that coherent scene structure facilitates the  
443 extraction of object information only when the objects are relevant for current  
444 behavioral goals.

445

### 446 ***4.2 Interactions between object and scene processing are mediated by scene*** 447 ***structure***

448 Our findings support the view that the scene and object processing pathways are not  
449 functionally separate, but that scene information can aid the extraction of object  
450 information (Brandmann & Peelen, 2017). Theories of contextual facilitation propose  
451 that scene structure is analyzed rapidly, potentially based on coarse low-spatial  
452 frequency information (Bar, 2004; Bar et al., 2006). This idea is consistent with the  
453 observation that an initial representation of scene meaning – the scene’s “gist” – can  
454 be extracted from just a single glance (Greene & Oliva, 2009; Oliva & Torralba, 2006,  
455 2007). Contextual facilitation theories argue that detailed object analysis is facilitated  
456 by this more readily available information about scene gist (Bar, 2004; Hochstein &

457 Ahissar, 2002). Informing object analysis through the analysis of coarse scene  
458 properties may be particularly useful when perception is challenged by the presence  
459 of many distracter items and limited visual exposure. Probing perception with such a  
460 challenging task, our study shows that the cross-facilitation between object and  
461 scene processing is mediated by the scene's structural coherence: When the analysis  
462 of scene gist is disrupted by jumbling the scene, contextual information cannot  
463 amplify object processing in the same way as it can for intact scenes.

464         The enhanced extraction of object information from the intact scenes suggests  
465 that useful information about scene gist is extracted less efficiently from the jumbled  
466 scenes. Indeed, the rapid analysis of scene gist depends on our priors about typical  
467 scene composition (Csathó et al., 2015; Greene et al., 2015). Neuroimaging studies  
468 suggest that the cortical scene processing network is tuned to these priors (Kaiser et  
469 al., 2020a; Torralbo et al., 2013), and that the early extraction of properties like the  
470 scene's basic-level category depends on the structural coherence of the scene  
471 (Kaiser et al., 2020b). Jumbling is a strong manipulation in the sense that it disrupts  
472 multiple aspects of the scene's spatial coherence at the same time: it disrupts the  
473 spatial positioning of individual pieces of information in visual space (Kaiser et al.,  
474 2018; Mannion, 2015), the positioning of objects relative to each other (Kaiser et al.,  
475 2019; Kaiser & Peelen, 2018), as well as the typical geometry of the scene (Dillon et  
476 al., 2018; Spelke & Lee, 2012). Future research is needed to disentangle these  
477 different factors, and how much they each contribute to the facilitation of object  
478 representation.

479         Although jumbling is a strong manipulation that conflates multiple factors of  
480 scene structure, it preserves critical characteristics of the objects: First, the objects  
481 remain completely unaltered across the intact and jumbled scenes. Second, the  
482 objects' absolute positions in visual space were matched across the intact and  
483 jumbled scenes. Finally, each object's local visual context remains constant across  
484 the intact and jumbled scenes. These properties allow us to attribute differences in  
485 object representations to facilitates effects from cortical scene analysis: If the visual  
486 brain would not take global scene context into account and would only analyze the  
487 objects in their local visual surroundings, our paradigm should yield comparable  
488 results for structurally coherent, intact scenes and incoherent, jumbled scenes.

489

#### 490 **4.2 Attention mediates contextual facilitation effects**

491 Unlike task-relevant objects, task-irrelevant objects were not processed differently as  
492 a function of scene coherence. This finding shows that contextual facilitation of object  
493 processing is not an automatic process. On the contrary, interactions between the  
494 object and scene processing systems seem to be mediated by attention. This  
495 observation fits well with previous results from studies on object detection in natural  
496 scenes. Compared to task-relevant objects, multi-voxel response patterns in visual  
497 cortex contain far less information about unattended objects (Peelen et al., 2009;  
498 Peelen & Kastner, 2011). Further, MEG decoding results suggest strong differences  
499 in the representation of attended and unattended object categories (Kaiser et al.,  
500 2016): Particularly at early stages of processing, within the first 200ms after stimulus  
501 onset, the category of unattended objects is represented less accurately. Beyond the  
502 visual brain, differences in task demands also affect more widespread activations  
503 across the cortex (Cukur et al., 2013; Harel et al., 2014; Hebart et al., 2018; Nastase  
504 et al., 2017), potentially causing substantial task-related changes in processing  
505 dynamics. One such change may be an alteration of the crosstalk between  
506 representations in different visual domains. Our data indeed suggests that the  
507 exchange of information between the object and scene processing pathways is not  
508 mandatory, but rather constitutes an adaptive mechanism for improving task  
509 performance. Under this view, interactions between the scene and object processing  
510 pathways may be specifically “switched on” when objects are part of current  
511 attentional templates (Battistoni et al., 2017; Peelen & Kastner, 2011). The specific  
512 mechanism underlying this adaptive control of the crosstalk between scene and  
513 object processing needs further investigation.

514         How does the apparent importance of attention tie in with previous studies that  
515 reported a cross-facilitation between the object and scene-processing systems  
516 (Brandmann & Peelen, 2017, 2019)? While these studies did not use object  
517 categorization tasks, they still explicitly asked participants to attend to the objects  
518 appearing within the scene (either by asking them to memorize them or through one-  
519 back tasks). In our scene categorization task, the situation was entirely different, as  
520 the objects were completely irrelevant for solving the task. In fact, this orthogonality

521 of object and scene category in our design may have introduced an active  
522 suppression of object information when participants performed the scene  
523 categorization task. Previous studies suggest that task-irrelevant distracter objects  
524 can be suppressed effectively and quickly (Seidl et al., 2012; Hickey et al., 2019).  
525 During the scene task, we indeed found numerically better object representations for  
526 jumbled scenes. This tentative reversal of the facilitation effect could hint at a more  
527 efficient suppression of object information when the object is embedded in a  
528 structurally coherent scene. Although largely speculative at this point, this assertion  
529 could be tested in future experiments that include additional conditions in which the  
530 scene and the objects are similarly task-relevant.

531

#### 532 **4.4 Conclusion**

533 In conclusion, our results show that the object and scene processing pathways can  
534 interact to facilitate the processing of task-relevant object information embedded in  
535 coherent scenes. However, such interactions are not mandatory. They rather seem  
536 to be guided by current behavioral goals. Our findings therefore suggest that the  
537 visual brain adaptively exploits coherent scene context to resolve object perception  
538 in challenging real-world situations.

539

540 **Acknowledgements**

541

542 We thank Sina Schwarze for helping with the stimulus collection. D.K. and R.M.C. are  
543 supported by Deutsche Forschungsgemeinschaft (DFG) grants (KA4683/2-1,  
544 CI241/1-1, CI241/3-1). G.H. is supported by a PhD fellowship of the Einstein Center  
545 for Neurosciences Berlin. R.M.C. is supported by a European Research Council  
546 Starting Grant (ERC-2018-StG 803370).

547

548 **References**

549

550 Bar M. (2004). Visual objects in context. *Nat Neurosci*, 5, 617-629.

551 Bar M, Kassam KS, Ghuman AS, Boshyan J, Schmid AM, Dale AM, Hämäläinen MS,  
552 Marinkovic K, Schacter DL, Rosen BR, Halgren E. (2006). Top-down facilitation  
553 of visual recognition. *Proc Natl Acad Sci USA*, 103, 449-454.

554 Battistoni E, Stein T, Peelen MV. (2017). Preparatory attention in visual cortex. *Ann N*  
555 *Y Acad Sci*, 1396, 92-107.

556 Biederman I. (1972). Perceiving real-world scenes. *Science*, 177, 77-80.

557 Biederman I, Glass AL, Stacy EW. (1973). Searching for objects in real-world scenes.  
558 *J Exp Psychol*, 97, 22-27.

559 Biederman I, Rabinowitz JC, Glass AL, Stacy EW. (1974). On the information  
560 extracted from a glance at a scene. *J Exp Psychol*, 103, 597-600.

561 Brandman T, Peelen MV. (2017). Interaction between scene and object processing  
562 revealed by human fMRI and MEG decoding. *J Neurosci*, 37, 7700-7710.

563 Brandman T, Peelen MV. (2019). Signposts in the fog: objects facilitate scene  
564 representations in left scene-selective cortex. *J Cogn Neurosci*, 31, 390-400.

565 Brainard DH. (1997). The psychophysics toolbox. *Spat Vis*, 10, 433-436.

566 Cauchoix M, Barragan-Jason G, Serre T, Barbeau EJ. (2014). The neural dynamics of  
567 face detection in the wild revealed by MVPA. *J Neurosci*, 34, 846-854.

568 Csathó Á, van der Linden D, Gács B. (2015). Natural scene recognition with increasing  
569 time-on-task: the role of typicality and global image properties. *Q J Exp*  
570 *Psychol*, 68, 814-828.

571 Cukur T, Nishimoto S, Huth AG, Gallant JL. (2013). Attention during natural vision  
572 warps semantic representation across the human brain. *Nat Neurosci* 16, 763-  
573 770.

574 Dillon MR, Persichetti AS, Spelke ES, Dilks DD. (2018). Places in the brain: bridging  
575 layout and object geometry in scene-selective cortex. *Cereb Cortex*, 28, 2365-  
576 2374.

- 577 Greene MR, Botros AP, Beck DM, Fei-Fei L. (2015). What you see is what you expect:  
578 rapid scene understanding benefits from prior experience. *Atten Percept*  
579 *Psychophys*, 77, 1239-1251.
- 580 Greene MR, Oliva A. (2009). Recognition of natural scenes from global properties:  
581 seeing the forest without representing the trees. *Cogn Psychol*, 58, 137-176.
- 582 Harel A, Kravitz DJ, Baker CI. (2014). Task context impacts visual object processin  
583 differentially across the cortex. *Proc Natl Acad Sci USA*, 111, 962-971.
- 584 Haxby JV, Gobbini IM, Furey ML, Ishai A, Schouten JL, Pietrini P. (2001). Distributed  
585 and overlapping representations of faces and objects in ventral temporal  
586 cortex. *Science*, 293, 2425-2430.
- 587 Hebart MN, Bankson BB, Harel A, Baker CI, Cichy RM. (2018). *eLife*, 7, e32816.
- 588 Hickey C, Pollicino D, Bertazzoli G, Barbaro L. (2019). Ultrafast object detection in  
589 naturalistic vision relies on ultrafast distractor suppression. *J Cogn Neurosci*,  
590 31, 1563-1572.
- 591 Hochstein S, Ahissar M. (2002). View from the top: hierarchies and reverse hierarchies  
592 in the visual system. *Neuron*, 36, 791-804.
- 593 Julian JB, Fedorenko E, Webster J, Kanwisher N. (2012). An algorithmic method for  
594 functionally defining regions of interest in the ventral visual pathway.  
595 *Neuroimage*, 60, 2357-2364.
- 596 Kaiser D, Cichy RM. (2018). Typical visual-field locations enhance processing in  
597 object-selective channels of human occipital cortex. *J Neurophysiol*, 120, 848-  
598 853.
- 599 Kaiser D, Häberle G, Cichy RM. (2020a). Cortical sensitivity to natural scene structure.  
600 *Hum Brain Mapp*, 41, 1286-1295.
- 601 Kaiser D, Häberle G, Cichy RM. (2020b). Real-world structure facilitates the rapid  
602 emergence of scene category information in visual brain signals. *J*  
603 *Neurophysiol*, 124, 145-151.
- 604 Kaiser D, Oosterhof NN, Peelen MV. (2016). The neural dynamics of attentional  
605 selection in natural scenes. *J Neurosci*, 36, 10522-10528.
- 606 Kaiser D, Quek GL, Cichy RM, Peelen MV. (2019). Object vision in a structured world.  
607 *Trends Cogn Sci*, 23, 672-685.

- 608 Kaiser D, Peelen MV. (2018). Transformation from independent to integrative coding  
609 of multi-object arrangements in human visual cortex. *Neuroimage*, 169, 334-  
610 341.
- 611 Li FF, VanRullen R, Koch C, Perona P. (2002). Rapid natural scene categorization in  
612 the near absence of attention. *Proc Natl Acad Sci USA*, 99, 9596-9601.
- 613 Li X, Morgan PS, Ashburner J, Smith J, Rorden C. (2016). The first step for  
614 neuroimaging data analysis: DICOM to NIfTI conversion. *J Neurosci Methods*,  
615 264, 47-56.
- 616 Mannion DJ. (2015). Sensitivity to the visual field origin of natural image patches in  
617 human low-level visual cortex. *PeerJ*, 3, e1038.
- 618 Nastase SA, Connolly AC, Oosterhof NN, Halchenko YO, Guntupalli JS, Visconti di  
619 Oleggio Castello M, Gobbini I, Haxby JV. (2017). Attention selectively reshapes  
620 the geometry of distributed semantic representation. *Cereb Cortex*, 27, 4277-  
621 4291.
- 622 Oliva A, Torralba A. (2006). Building the gist of a scene: the role of global image  
623 features in recognition. *Prog Brain Res*, 155, 23-36.
- 624 Oliva A, Torralba A. (2007). The role of context in object recognition. *Trends Cogn Sci*,  
625 11, 520-527.
- 626 Oosterhof NN, Connolly AC, Haxby JV. (2016). CoSMoMMPA: Multi-modal  
627 multivariate pattern analysis of neuroimaging data in Matlab/GNU Octave.  
628 *Front Neuroinform*, 10, 20.
- 629 Peelen MV, Fei-Fei L, Kastner S. (2009). Neural mechanisms of rapid natural scene  
630 categorization in human visual cortex. *Nature*, 460, 94-97.
- 631 Peelen MV, Kastner S. (2011). A neural basis for real-world visual search in human  
632 occipitotemporal cortex. *Proc Natl Acad Sci USA*, 108, 12125-12130.
- 633 Potter MC. (1975). Meaning in visual search. *Science*, 187, 965-966.
- 634 Potter MC. (2012). Recognition and memory for briefly presented scenes. *Front*  
635 *Psychol*, 3, 32.
- 636 Seidl KN, Peelen MV, Kastner S. (2012). Neural evidence for distracter suppression  
637 during visual search in real-world scenes. *J Neurosci*, 32, 11812-11819.
- 638 Shahdloo M, Celik E, Cukur T. (2020). Biased competition in semantic representation  
639 during natural visual search. *Neuroimage*, 216, 116383.



- 640 Spelke ES, Lee SA. (2012). Core systems of geometry in animal minds. *Philos Trans*  
641 *R Soc Lond B Biol Sci*, 367, 2784-2793.
- 642 Thorpe S, Fize D, Marlot C. (1996). Speed of processing in the human visual system.  
643 *Nature*, 381, 520-522.
- 644 Torralba A, Oliva A, Castelhana MS, Henderson JM. (2006). Contextual guidance of  
645 eye movements and attention in real-world scenes: the role of global features  
646 in object search. *Psychol Rev*, 113, 766-786.
- 647 Torralbo A, Walther DB, Chai B, Caddigan E, Fei-Fei L, Beck DM. (2013). Good  
648 exemplars of natural scene categories elicit clearer patterns than bad  
649 exemplars but not greater BOLD activity. *Plos One*, 8, e58594.
- 650 VanRullen R, Thorpe SJ. (2001). The time course of visual processing: from early  
651 perception to decision-making. *J Cogn Neurosci*, 13, 454-461.
- 652 Võ MLH, Boettcher SEP, Draschkow D. (2019). Reading scenes: How scene grammar  
653 guides attention and aids perception in real-world environments. *Curr Opin*  
654 *Psychol*, 29, 205-210.
- 655 Wang L, Mruczek RE, Arcaro MJ, Kastner S. (2015). Probabilistic maps of visual  
656 topography in human cortex. *Cereb Cortex*, 25, 3911-3931.
- 657 Wolfe JM, Võ ML-H, Evans KK, Greene MR. (2011). Visual search in scenes involves  
658 selective and nonselective pathways. *Trends Cogn Sci*, 15, 77-84.
